# Supplementary material for: DUSP11 activity on triphosphorylated transcripts promotes Argonaute association with noncanonical viral microRNAs and regulates steady-state levels of cellular noncoding RNAs
Source: PubMed Central journal article supplement — Genes Dev. 2016 Sep 15;30(18):2076–92. doi: 10.1101/gad.282616.116 (PMC5066614; doi:10.1101/gad.282616.116), 2016-09-15
Supplement: supp_30.18.2076_Supplemental_Fig_S1.pdf [file supp_30.18.2076_Supplemental_Fig_S1.pdf]

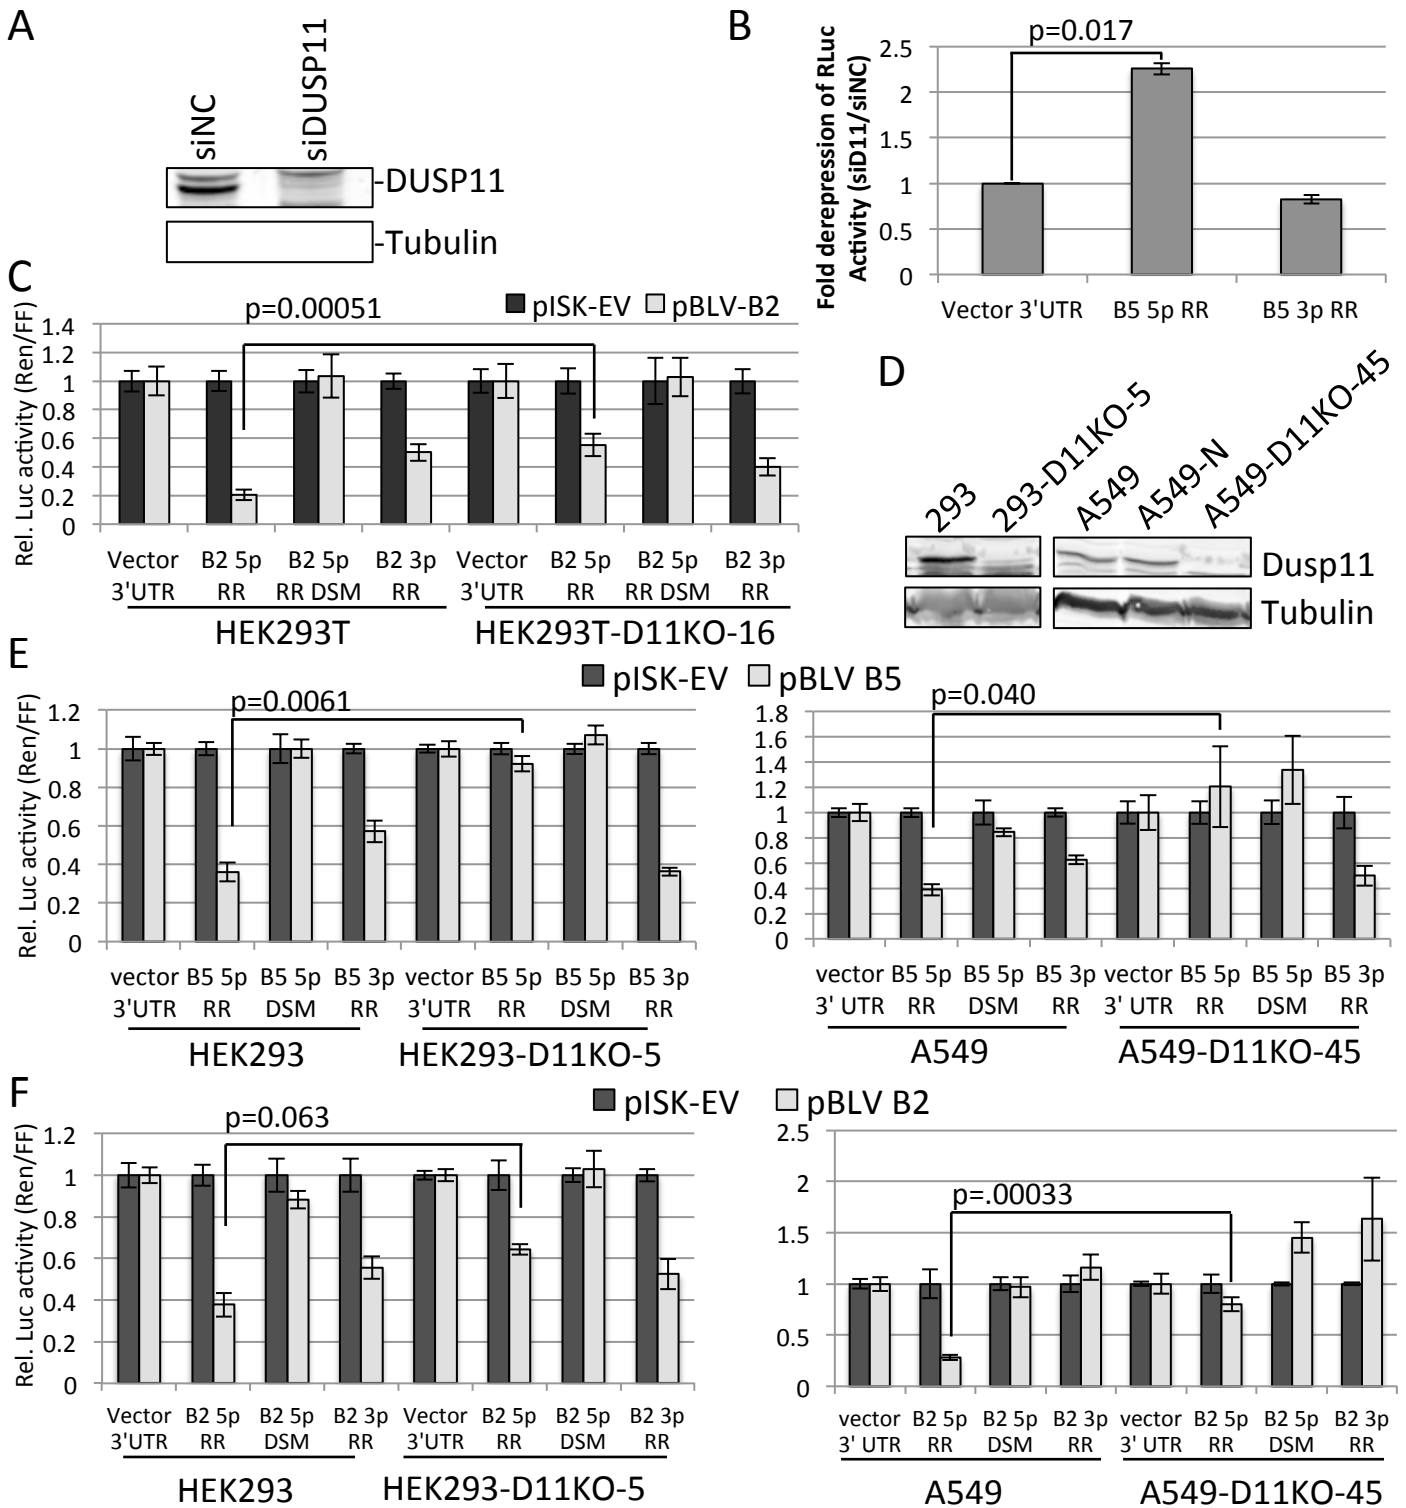

### Supplemental Figure 1. Knockdown or knockout of DUSP11 decreases RISC activity of BLV 5p miRNAs.

(A) Immunoblot analysis of DUSP11 levels in HEK293T cells transfected with either negative control siRNAs (siNC) or DUSP11-targeting siRNAs (siD11). (B) RISC reporter assay to measure the RISC activity of BLV-B5 miRNAs in 293T cells treated with either negative control siRNAs (siNC) or DUSP11-specific siRNAs (siD11). Bars represent the mean fold change (siD11/siNC) of the Renilla/firefly ratio from 3 independent experiments +/- SEM (n=3). Data was normalized to the vector 3' UTR reporter and pBLV-B1 vector. The p-value was calculated using one sample t-test. (C) RISC reporter assay of the B2 miRNAs in parental and DUSP11-KO-16 HEK293T cells. Bars represent average ratio +/- SEM. For Vector 3'UTR, B2-5p RR, and B2-3p RR six independent experiments were performed in triplicate (n=6). For B2-5p DSM two experiments performed in triplicate were performed (n=2). (D) Western blot for DUSP11 in HEK293 and A549 clones that were positive for DUSP11 knockout. A549-N was a clone negative for knockout of DUSP11. (E,F) RISC reporter assays of the BLV-B5 miRNAs (E) and BLV-B2 miRNAs (F) in parental and DUSP11-KO HEK293 and A549 cell lines. Bars represent the mean +/- SEM of 3-4 independent experiments in which transfections were performed in triplicate.
