# Supplementary material for: DUSP11 activity on triphosphorylated transcripts promotes Argonaute association with noncanonical viral microRNAs and regulates steady-state levels of cellular noncoding RNAs
Source: PubMed Central journal article supplement — Genes Dev. 2016 Sep 15;30(18):2076–92. doi: 10.1101/gad.282616.116 (PMC5066614; doi:10.1101/gad.282616.116), 2016-09-15
Supplement: supp_30.18.2076_Supplemental_Fig_S2.pdf [file supp_30.18.2076_Supplemental_Fig_S2.pdf]

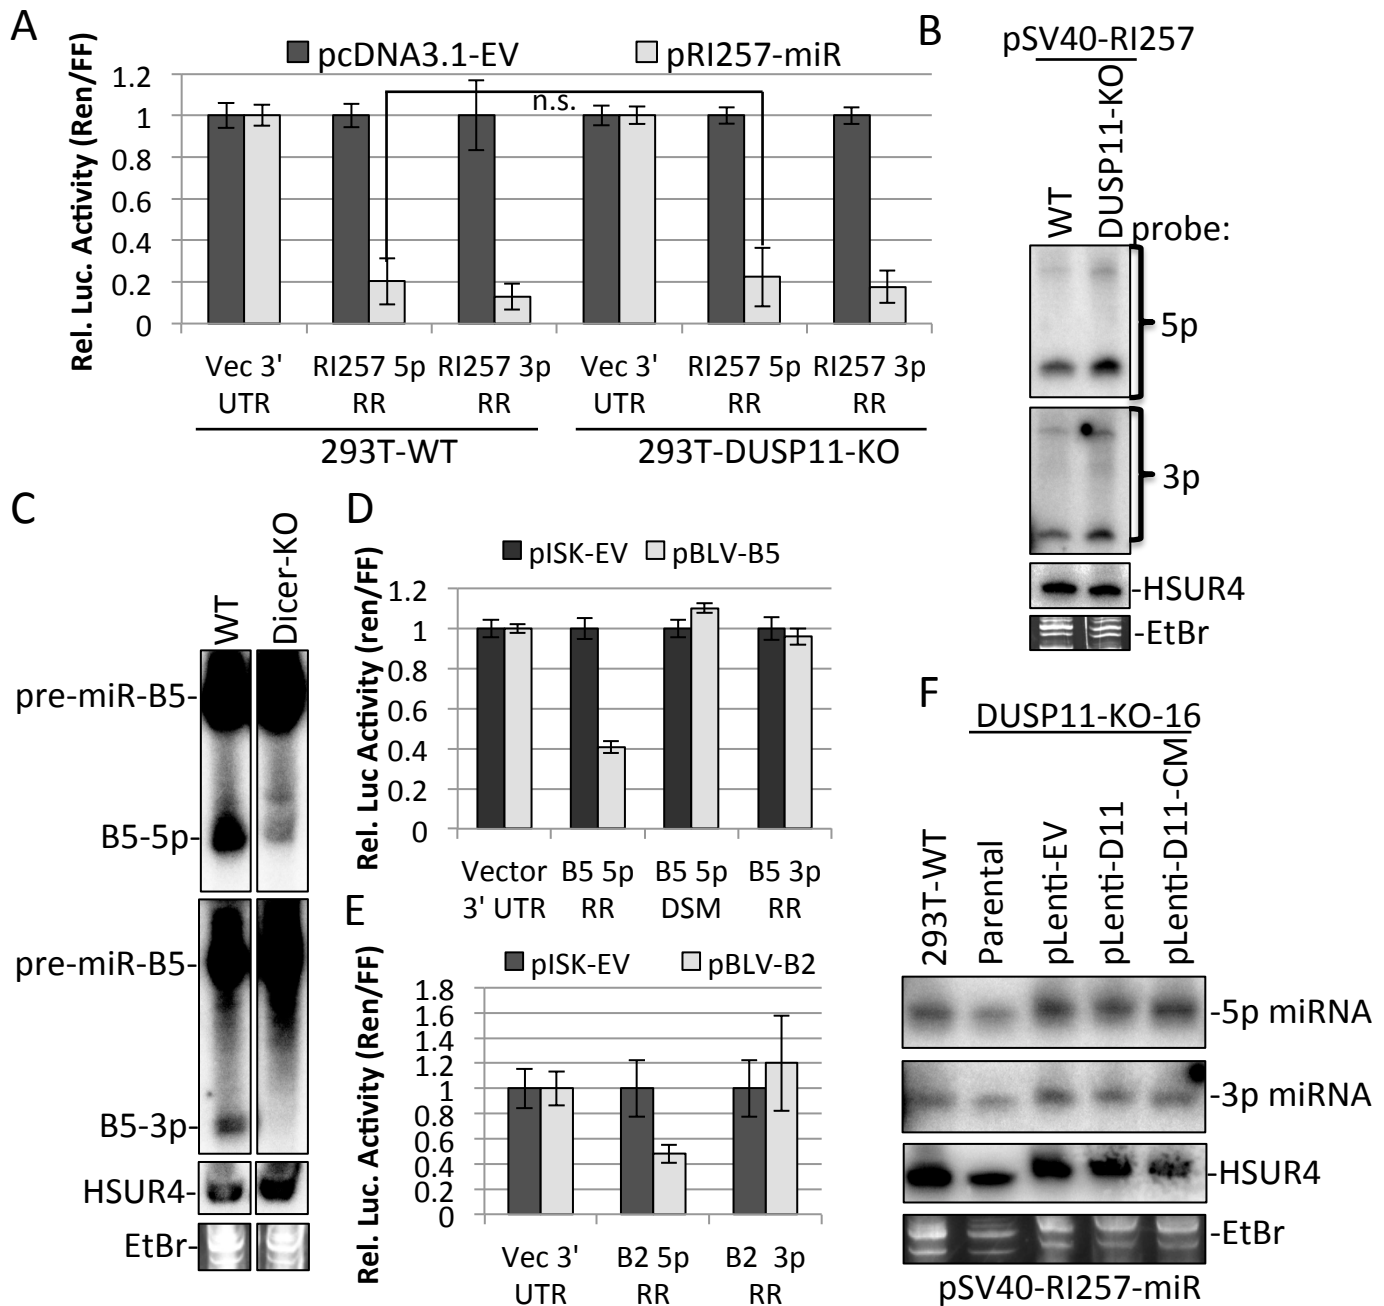

**Supplemental Figure 2. Analysis of the BLV and SV40 miRNAs in DUSP11-KO and Dicer-KO HEK293T cells.** (A) Luciferase assay to measure RISC activity of SV40-Ri257 miRNAs in parental (WT) and DUSP11-KO-16 HEK293T cells. Three independent experiments were performed in quadruplicate. Bars represent the mean ratio (Renilla/Firefly)  $\pm$  SEM (n=3). Ratios were normalized to pcDNA3.1-EV and the vector 3' UTR reporter. (B) Northern blot analysis of SV40-Ri257 miRNAs from WT and DUSP11-KO HEK293T cells transfected with pSV40-Ri257-miR expression vector. (C) A repeat of the northern blot analysis shown in Figure 2, demonstrating that a small amount of the B5 5p miRNA but not the 3p miRNA is generated in the Dicer-KO cells. (D) Luciferase assay to measure the RISC activity of the BLV-B5 miRNAs in Dicer-KO cells. For the Vector 3'-UTR, B5-5p RR, and B5-3p RR the bars represent the mean ratio  $\pm$  SEM from six experiments. For the B5-5p DSM the bars represent the mean ratio  $\pm$  SEM of 3 experiments. (E) Luciferase assay to measure the RISC activity of the BLV-B2 miRNAs in Dicer-KO cells. Bars represent the mean ratio (Ren/FF)  $\pm$  SEM of three experiments performed in triplicate. (F) Northern blot analysis of SV40-Ri257 miRNAs from WT DUSP11-KO, DUSP11-KO-EV, DUSP11-KO-D11, DUSP11-KO-D11-CM HEK293T cell lines transfected with pSV40-Ri257-miR expression vector. Membranes were first probed with the 5p probe and then stripped and re-probed with the 3p probe.
