# Supplementary material for: DUSP11 activity on triphosphorylated transcripts promotes Argonaute association with noncanonical viral microRNAs and regulates steady-state levels of cellular noncoding RNAs
Source: PubMed Central journal article supplement — Genes Dev. 2016 Sep 15;30(18):2076–92. doi: 10.1101/gad.282616.116 (PMC5066614; doi:10.1101/gad.282616.116), 2016-09-15
Supplement: supp_30.18.2076_Supplemental_Fig_S3.pdf [file supp_30.18.2076_Supplemental_Fig_S3.pdf]

**A**

| miRNA           | Sequence                | Read count/million reads (Rep 1, Rep 2) |              |              |              | Ratio (P+/P-) (Rep1, Rep2) |            |
|-----------------|-------------------------|-----------------------------------------|--------------|--------------|--------------|----------------------------|------------|
|                 |                         | WT P-                                   | WT P+        | DUSP11-KO P- | DUSP11-KO P+ | WT                         | D11-KO     |
| BLV-miR-B5-5p   | AAGGAAGGTTGTGGCTCAGAGGT | 19870, 2760                             | 31915, 1810  | 1847, 242    | 2410, 278    | 1.61, 0.66                 | 1.30, 1.15 |
| BV-miR-B5-3p    | CTCGGACCGCAACCTCCCTTTC  | 1417, 1150                              | 1390, 1021   | 1489, 1392   | 1138, 1233   | 0.98, 0.89                 | 0.76, 0.89 |
| BLV-miR-B2-5p   | ACATGACTGAGTGTAGCGCAGA  | 10658, 7713                             | 6436, 5647   | 2748, 738    | 2863, 1202   | 0.60, 0.73                 | 1.04, 1.63 |
| BLV-miR-B2-3p   | TGCGTGTACTCAGTCATTTT    | 1187, 4927                              | 706, 5456    | 2153, 7850   | 2387, 6837   | 0.59, 1.11                 | 1.11, 0.87 |
| hsa-miR-10a-5p  | TACCCTGTAGATCCGAATTTGTG | 33070, 58933                            | 31966, 59910 | 59056, 85080 | 45142, 68320 | 0.78, 1.02                 | 0.68, 0.80 |
| hsa-miR-92a-3p  | TATTGCACTTGTCCCGCCTGT   | 27074, 39940                            | 20769, 28441 | 29323, 37787 | 22237, 28101 | 0.62, 0.71                 | 0.68, 0.74 |
| hsa-miR-25-3p   | CATTGCACTTGTCTCGGTCTGA  | 2182930243                              | 16034, 21166 | 23487, 27384 | 17877, 21400 | 0.60, 0.70                 | 0.68, 0.78 |
| hsa-miR-148a-3p | TCAGTGCCTACAGAACTTTGT   | 13923, 51391                            | 10898, 54253 | 57100, 71919 | 26603, 59109 | 0.64, 1.06                 | 0.42, 0.82 |
| hsa-miR-7-5p    | TGGAAGACTAGUGATTTTGTGT  | 11061, 21296                            | 11484, 19415 | 25732, 22770 | 17479, 19595 | 0.84, 0.91                 | 0.61, 0.86 |

**B**

| RNA          | Sequence                          | Rep 1, Rep 2     |                     |
|--------------|-----------------------------------|------------------|---------------------|
|              |                                   | Ratio WT (P+/P-) | Ratio D11KO (P+/P-) |
| 5'-end 5sRNA | GTCTACGGCCATACCACCCTGAACGC        | 4.82, 3.38       | 49.1, 51.0          |
| 3'-end 5sRNA | ACCGGGTGTGTAGGCTTT                | 0.73, 0.72       | 0.69, 0.22          |
| 5'-end YRNA1 | GGCTGGTCCGAAGGTAGTGTAGTTATCTCAATT | 2.23, 3.12       | 6.58, 3.12          |
| 3'-end YRNA1 | CTTCTCACTACTGCCTTACTAGTCTT        | 0.91, 0.77       | 0.88, 0.23          |
| 5'-end YRNA3 | GGCTGGTCCGAGTGCAGTGGTGTTTACAAC    | 0.62, 0.76       | 3.32, 0.87          |
| 3'-end YRNA3 | CTCCCACTGCTTCACTTACTAGCCTT        | 0.42, 0.68       | 0.92, 0.25          |
| 5'-end YRNA4 | GGCTGGTCCGATGGTGTGGTTATCAGAACT    | 1.88, 1.85       | 3.65, 1.66          |
| 3'-end YRNA4 | CCCCCACTGCTAAATTTGACTGGCTT        | 0.42, 0.54       | 0.84, 0.27          |
| 5'-end YRNA5 | AGTTGGTCCGAGTGTGTGGTTATT          | 28.07, 7.07      | 70.43, 6.03         |
| 3'-end YRNA5 | CTTGACTAGCTTGCTGTTT               | 0.51, 0.93       | 1.25, 0.26          |

**C**

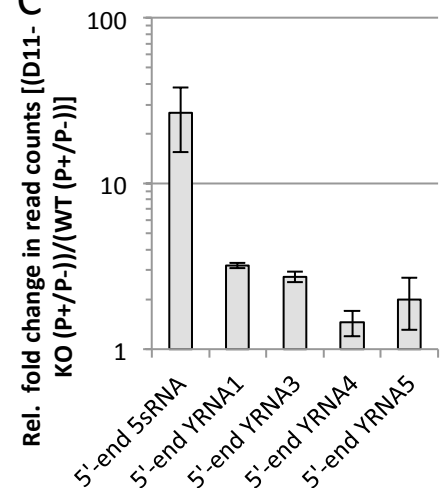

**D**

| 5S rRNA | Sequence                   | Pumilio2-SRR048967 | Pumilio2-SRR048968 | AGO1-SRR048973 | AGO2-SRR048974 | AGO2-SRR048975 | AGO3-SRR048976 | AGO3-SRR048977 | AGO4-SRR048978 | AGO4-SRR048979 | AGO2-miR-124-SRR048980 | AGO2-miR-7-SRR048981 |
|---------|----------------------------|--------------------|--------------------|----------------|----------------|----------------|----------------|----------------|----------------|----------------|------------------------|----------------------|
| 5'-end  | GTCTACGGCCATACCACCCTGAACGC | 0                  | 0                  | 0              | 0              | 0              | 0              | 0              | 0              | 0              | 0                      | 0                    |
| 5'-end  | GTCTACGGCCATACCACCCTGAAC   | 0                  | 0                  | 4              | 0              | 0              | 4              | 0              | 0              | 20             | 1                      | 2                    |
| 5'-end  | GTCTACGGCCATACCACCCT       | 0                  | 0                  | 0              | 0              | 0              | 7              | 0              | 0              | 3              | 2                      | 2                    |
| 5'-end  | GTCTACGGCCATACCACCCTGAACG  | 0                  | 1                  | 25             | 0              | 0              | 19             | 0              | 2              | 32             | 6                      | 9                    |
| 5'-end  | GTCTACGGCCATACCACCCTGA     | 0                  | 0                  | 1              | 0              | 0              | 1              | 0              | 0              | 7              | 1                      | 0                    |
| 5'-end  | GTCTACGGCCATACCACCCTG      | 0                  | 0                  | 70             | 0              | 1              | 32             | 0              | 3              | 6              | 17                     | 20                   |
| Freq.   | GTCTACGGCCATACCACCCTG...   | 1.00               | 1.00               | 0.69           | 0.99           | 1.00           | 0.59           | 1.00           | 1.00           | 1.00           | 0.90                   | 0.96                 |
|         | GTCTACGGCCATACCACCCTG...   | 0.00               | 0.00               | 0.31           | 0.01           | 0.00           | 0.41           | 0.00           | 0.00           | 0.00           | 0.10                   | 0.04                 |

**Supplemental Figure 3. Small RNA sequencing of host and BLV small RNAs in WT and DUSP11-KO cells.**

(A) Small RNA read counts from RNA treated with (P+) or without (P-) RNA-5'-polyphosphatase prior to library preparation from parental (WT) and DUSP11-KO HEK293T cells. The read counts for the most abundant miRNAs that perfectly mapped to the 5p arm or the 3p arm of BLV B2 and B5 pre-miRNAs in parental (WT) and DUSP11-KO HEK293T cells are shown in the table. The read counts for five host miRNAs, which are generally the 5 most abundant miRNAs in each small RNA library, are shown in the table. The read counts were normalized to reads per million total reads in each library. Two independent replicates are shown in the table separated by the comma. The ratio of phosphatase pre-treated to untreated (P+/P-) for both the WT and D11-KO cells is shown in the table. (B) Ratios of the total read counts (P+/P-) of the generally most abundant small RNA (18-32 nts) that maps to either the 5'-end or 3'-end of the 5s rRNA and the Y-RNAs (Supplemental Data 1). (C) Graph showing the average ratio (P+/P-) of the RNAs in (B). Ratios were normalized to the 3p arm. The DUSP11-KO ratios were then normalized to the WT ratio. (D) Meta analysis of PAR-CLIP data (Hafner et al., 2010). The read counts for the 5'-end derivative of the 5S rRNA are shown for indicated immunoprecipitated negative control (Pumilio) and the indicated AGO proteins. The transition (T to C) frequency observed at nucleotide 12 (highlight in red) of RNAs that map to the 5'-end of the 5S rRNA is shown for each library.
