# Supplementary material for: DUSP11 activity on triphosphorylated transcripts promotes Argonaute association with noncanonical viral microRNAs and regulates steady-state levels of cellular noncoding RNAs
Source: PubMed Central journal article supplement — Genes Dev. 2016 Sep 15;30(18):2076–92. doi: 10.1101/gad.282616.116 (PMC5066614; doi:10.1101/gad.282616.116), 2016-09-15
Supplement: supp_30.18.2076_Supplemental_Fig_S5.pdf [file supp_30.18.2076_Supplemental_Fig_S5.pdf]

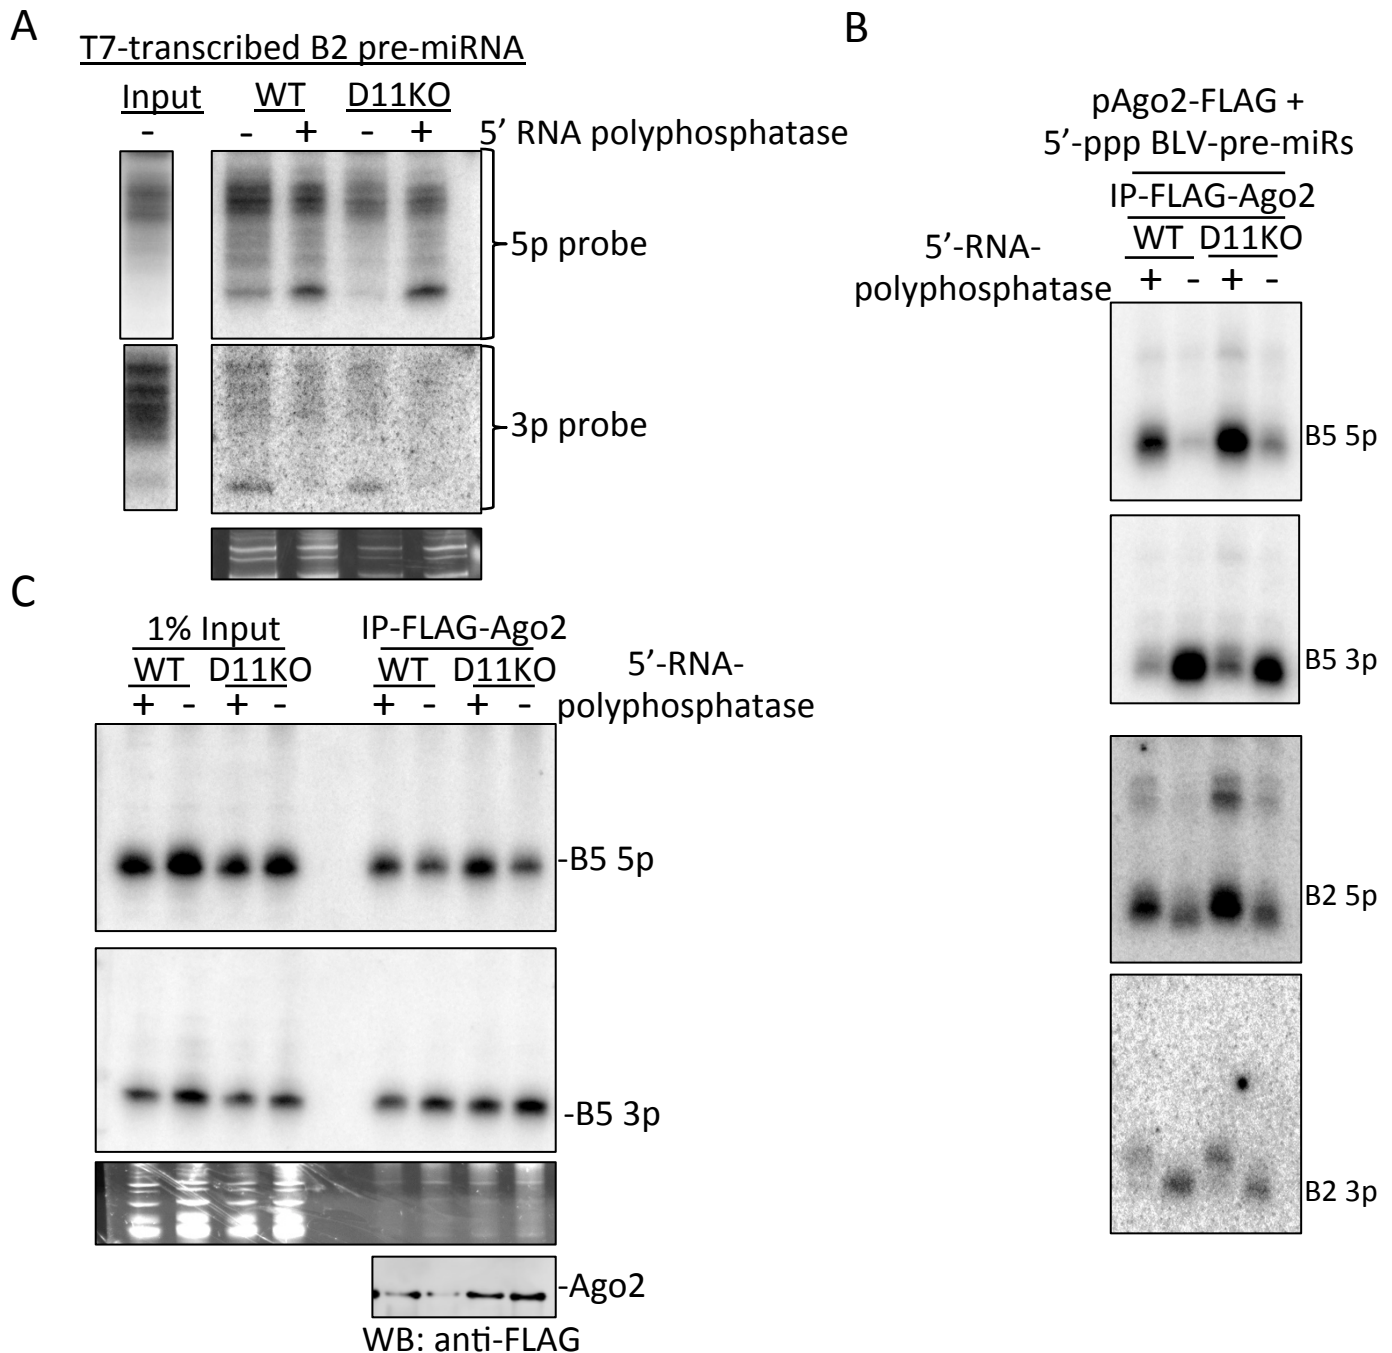

**Supplemental Figure 5. A 5'-triphosphate on the BLV pre-miRNA and duplexed-miRNA mimics decreases 5p miRNA association with Argonaute.**

(A) Northern blot analysis of 5p and 3p miRNAs in parental (WT) and DUSP11-KO HEK293T cells transfected with the BLV-B2 pre-miRNA mimic treated with or without RNA-5'-polyphosphatase. (B) RIP-northern blot analysis for Argonaute 2 from parental (WT) and DUSP11-KO HEK293T cells co-transfected with the 5'-triphosphorylated BLV-B5 and BLV-B2 pre-miRNA mimics treated with or without RNA-5'-polyphosphatase and pAgo2-FLAG. The membrane was stripped and re-probed for the indicated miRNAs. (C) RIP-northern blot analysis for Argonaute 2 from parental (WT) and DUSP11-KO HEK293T cells co-transfected with the 5'-triphosphorylated BLV-B5 duplexed-miRNA mimics treated with or without RNA-5'-polyphosphatase and the pAgo2-FLAG. The membrane was stripped and re-probed for the indicated miRNAs.
