# Supplementary material for: DUSP11 activity on triphosphorylated transcripts promotes Argonaute association with noncanonical viral microRNAs and regulates steady-state levels of cellular noncoding RNAs
Source: PubMed Central journal article supplement — Genes Dev. 2016 Sep 15;30(18):2076–92. doi: 10.1101/gad.282616.116 (PMC5066614; doi:10.1101/gad.282616.116), 2016-09-15
Supplement: supp_30.18.2076_Supplemental_Table_S1.pdf [file supp_30.18.2076_Supplemental_Table_S1.pdf]

**Supplemental Table 1. List of oligonucleotides**

| Oligo name                           | sequence                                                                                                                                                                                                                                                                                                                                                                                                                                                                                                                      |
|--------------------------------------|-------------------------------------------------------------------------------------------------------------------------------------------------------------------------------------------------------------------------------------------------------------------------------------------------------------------------------------------------------------------------------------------------------------------------------------------------------------------------------------------------------------------------------|
| B5 5p probe                          | ACCTCTGAGCCACAACCTTCCTT                                                                                                                                                                                                                                                                                                                                                                                                                                                                                                       |
| B5 3p probe                          | AGAAAGGGAGGTTGCGGTCCGA                                                                                                                                                                                                                                                                                                                                                                                                                                                                                                        |
| B2 3p probe                          | AAATGACTGAGTGACACGCA                                                                                                                                                                                                                                                                                                                                                                                                                                                                                                          |
| B2 5p probe                          | TCTCTGCGCTACACTCAGTCATGT                                                                                                                                                                                                                                                                                                                                                                                                                                                                                                      |
| B4 3p probe                          | AAAGGCGCAGAGACTGTGGTGCTA                                                                                                                                                                                                                                                                                                                                                                                                                                                                                                      |
| B4 5p probe                          | TCCCAGCACCAGAGCCTCTC                                                                                                                                                                                                                                                                                                                                                                                                                                                                                                          |
| T7 B5 G5p strand sense               | GGATCCTTAATACGACTCACTATAGAGGAAGGTTGTGGCTCAGAGGT                                                                                                                                                                                                                                                                                                                                                                                                                                                                               |
| T7 B5 G5p strand antisense           | ACCTCTGAGCCACAACCTTCCTCTATAGTGAGTCGTATTAAGGATCC                                                                                                                                                                                                                                                                                                                                                                                                                                                                               |
| T7 B5 5p strand sense                | GGATCCTTAATACGACTCACTATAAAGGAAGGTTGTGGCTCAGAGGT                                                                                                                                                                                                                                                                                                                                                                                                                                                                               |
| T7 B5 5p strand antisense            | ACCTCTGAGCCACAACCTTCCTTTATAGTGAGTCGTATTAAGGATCC                                                                                                                                                                                                                                                                                                                                                                                                                                                                               |
| T7 B5 G3p strand sense               | GGATCCTTAATACGACTCACTATAGTCGAGCTATTTAACCTCTGAGCCACAACCTTCCTCTATAGTGAGTCGTATTAAGGATCC                                                                                                                                                                                                                                                                                                                                                                                                                                          |
| T7 B5 G3p strand antisense           | GAAAGGGAGGTTGCGGTCCGAGCTATAGTGAGTCGTATTAAGGATCC                                                                                                                                                                                                                                                                                                                                                                                                                                                                               |
| T7 B2 pre-miRNA 5'G sense            | GGATCCTTAATACGACTCACTATAGCATGACTGAGTGTAGCGCAGAGAGGTTGTCGTTCTGCGTGTCACTCAGTCATTTT                                                                                                                                                                                                                                                                                                                                                                                                                                              |
| T7 B2 pre-miRNA 5'G antisense        | AAAATGACTGAGTGACACGAGAGCCGACAACCTCTCTGCGCTACACTCAGTCATGCTATAGTGAGTCGTATTAAGGATCC                                                                                                                                                                                                                                                                                                                                                                                                                                              |
| T7 B5 pre-miRNA 5'G sense            | GGATCCTTAATACGACTCACTATAGAGGAAGGTTGTGGCTCAGAGGTTAAAATAGTCGGACCCGCAACCTCCCTTTC                                                                                                                                                                                                                                                                                                                                                                                                                                                 |
| T7 B5 pre-miRNA 5'G antisense        | GAAAGGGAGGTTGCGGTCCGAGCTATTTAACCTCTGAGCCACAACCTTCCTCTATAGTGAGTCGTATTAAGGATCC                                                                                                                                                                                                                                                                                                                                                                                                                                                  |
| T7 B5 pre-miRNA sense                | GGATCCTTAATACGACTCACTATAAAGGAAGGTTGTGGCTCAGAGGTTAAAATAGTCGGACCCGCAACCTCCCTTTC                                                                                                                                                                                                                                                                                                                                                                                                                                                 |
| T7 B5 pre-miRNA antisense            | GAAAGGGAGGTTGCGGTCCGAGCTATTTAACCTCTGAGCCACAACCTTCCTTTATAGTGAGTCGTATTAAGGATCC                                                                                                                                                                                                                                                                                                                                                                                                                                                  |
| DUSP11 3x NT-Flag inner ext sen      | TTATAAAGATCATGACATCGACTACAAGGATGACGATGACAAGGCCAGTGGCATCATCC                                                                                                                                                                                                                                                                                                                                                                                                                                                                   |
| DUSP11 3x NT-Flag outer ext sen kpn1 | GTGGGTACCGCCACCATGGACTACAAGACCATGACGGTGATTATAAAGATCATGACATC                                                                                                                                                                                                                                                                                                                                                                                                                                                                   |
| DUSP11 491 sense                     | CTACCTCATTTGCGAGATATTTGATTG                                                                                                                                                                                                                                                                                                                                                                                                                                                                                                   |
| DUSP11 506 antisense                 | CAATCAAAATATCTGCAAAATGAGGTAG                                                                                                                                                                                                                                                                                                                                                                                                                                                                                                  |
| DUSP11 C152S sense                   | TATTTGGTGTCCACAGTACCCATGGT                                                                                                                                                                                                                                                                                                                                                                                                                                                                                                    |
| DUSP11 C152S antisense               | ACCATGGGTACTGTGGACCCAATA                                                                                                                                                                                                                                                                                                                                                                                                                                                                                                      |
| B55p DSM s xho1                      | AGTCTCGAGACCTCTGAGCCACAACGTTGGTTATCGGCTAACCTCT                                                                                                                                                                                                                                                                                                                                                                                                                                                                                |
| B55p DSM a xba1                      | CATTCTAGAAACCAACGTTGTGGCTCAGAGGTTAGCCGATAACCAA                                                                                                                                                                                                                                                                                                                                                                                                                                                                                |
| B25p DSM s xho1                      | ATGCCTCGAGTCTCTGCGCTACACTCACTGTTGTATCGGCTATCTCTG                                                                                                                                                                                                                                                                                                                                                                                                                                                                              |
| B25p DSM a xba1                      | GAGCTCTAGAACAACAGTGAGTGTAGCGCAGAGATAGCCGATACAACA                                                                                                                                                                                                                                                                                                                                                                                                                                                                              |
| HSUR4 probe                          | AGAGTAACTCTCTGGCTGTGGCC                                                                                                                                                                                                                                                                                                                                                                                                                                                                                                       |
| D11_gRNA_Block_1                     | ATCGATCGCTCGAGTGACAAAAAAGCAGGCTTTAAAGGAACCAATTTCAGTCGACTGGATCCGGTACCAAGGTCGGGCAGGAAGAGGGCCTAT<br>TTCCCATGATTCCTTCATATTTGCATATACGATACAAGGCTGTTAGAGAGATAAATTAGAATTAATTTGACTGTAAACACAAAGATATTAGTAC<br>AAAATACGTGACGTAGAAAAGTAATAATTTCTTGGGTAGTTTGCAGTTTTAAAATTAATGTTTTAAAATGGACTATCATATGCTTACCGTAACTT<br>GAAAGTATTTTCGATTTCTTGGCTTTATATATCTTGTGAAAGGACGAAACACCGTCTGAAAAGTCGCGTCTCGTTTTAGAGCTAGAAAATAGC<br>AAGTTAAAATAAAGGCTAGTCCGTTATCAACTTGAAAAGTGGCACCGAGTCGGTGCTTTTTTTTCTAGACCCAGCTTTCTTGTACAAAAGTTGGC<br>ATTA                |
| D11_gRNA_Block_2                     | ATCGATCGCTCGAGTGACAAAAAAGCAGGCTTTAAAGGAACCAATTTCAGTCGACTGGATCCGGTACCAAGGTCGGGCAGGAAGAGGGCCTAT<br>TTCCCATGATTCCTTCATATTTGCATATACGATACAAGGCTGTTAGAGAGATAAATTAGAATTAATTTGACTGTAAACACAAAGATATTAGTAC<br>AAAATACGTGACGTAGAAAAGTAATAATTTCTTGGGTAGTTTGCAGTTTTAAAATTAATGTTTTAAAATGGACTATCATATGCTTACCGTAACTT<br>GAAAGTATTTTCGATTTCTTGGCTTTATATATCTTGTGAAAGGACGAAACACCGTCTGAAAAGTCGCGTCTCGTTTTAGAGCTAGAAAATAGC<br>AAGTTAAAATAAAGGCTAGTCCGTTATCAACTTGAAAAGTGGCACCGAGTCGGTGCTTTTTTTTCTAGACCCAGCTTTCTTGTACAAAAGTTGGC<br>ATTA                |
| D11_FLK_gRNA                         | ATCGATCGCTCGAGTGACAAAAAAGCAGGCTTTAAAGGAACCAATTTCAGTCGACTGGATCCGGTACCAAGGTCGGGCAGGAAGAGGGCCTAT<br>TTCCCATGATTCCTTCATATTTGCATATACGATACAAGGCTGTTAGAGAGATAAATTAGAATTAATTTGACTGTAAACACAAAGATATTAGTAC<br>AAAATACGTGACGTAGAAAAGTAATAATTTCTTGGGTAGTTTGCAGTTTTAAAATTAATGTTTTAAAATGGACTATCATATGCTTACCGTAACTT<br>GAAAGTATTTTCGATTTCTTGGCTTTATATATCTTGTGAAAGGACGAAACACCGTCTGAAAAGTCGCGTCTCGTTTTAGAGCTAGAAAATAGC<br>AAGTTAAAATAAAGGCTAGTCCGTTATCAACTTGAAAAGTGGCACCGAGTCGGTGCTTTTTTTTCTAGACCCAGCTTTCTTGTACAAAAGTTGGC<br>ATTA                |
| CECR1_gBlock                         | gtacctcgagCTCCACCTCTGCTTCCCTCCTCCCAATGGTCCAGAATCCAGGGAAGTCACCTCTGTTTGTCCATCAGGCCGCTGTGACTCTGG<br>CCTGACTCAGATGAGCCCTTAATTCATCTCCCTCTCTCTTTGCCCTCTCCAGCTCATTTTTCCCAAGAGCAGTGATGTTTTCAAGTTAAATTA<br>AACCAGGGTACTCCACTGTGACAATTCAGAGCACTTAGAACTTGGCCCTCCACCAAGCTCCACCCGGGCTCCAGCATCTGTGACACAGGG<br>GTCTCTCCCATGTCTATCCACACAGGCCCCCAAGCACACTGGCCTCTGGCCTTAGGCCCTCTGGCTCTCTCAGCTGGGAATGCTGTTTCT<br>CTCCACTTTCATCTGCTGCCCTCTGTCACTCAGGTTTCCAGTCTTAGTCTCAGAAAGACTTGTCCCTTGGGGACCTTGTCTCGCTC<br>CCTCCTGACTTCAACCCGATGATCTctagaagt     |
| CECR1_DSM_gBlock                     | gtacctcgagCTCCACCTCTGCTTCCGAGCTCCCAATGGTCCAGAATCCAGGGAAGTCACCTCTGTTTGTCCATCAGGCCGCTGTGACTCTGG<br>CCTGACTCAGATGAGCCCTTAATTCATCTCCCTCTCTCTTTGCCCTCTCCAGCTCATTTTTCCCAAGAGCAGTGATGTTTTCAAGTTAAATTA<br>AACCAGGGTACTCCACTGTGACAATTCAGAGCACTTAGAACTTGGCCGAGCTCCACCAAGCTCCACCCGGGCTCCAGCATCTGTGACACAGGG<br>GTCTCTCCCATGTCTATCCACACAGGCCCCCAAGCACACTGGCCTCTGGCCTTAGGCCGAGCTGGCTCTCTCAGCTGGGAATGCTGTTTCT<br>CTCCACTTTCATCTGCTGCCCTCTGTCACTCAGGTTTCCAGTCTTAGTCTCAGAAAGACTTGTCCCTTGGGGACCTTGTCTCGCTC<br>GGACCTGACTTCAACCCGATGATCTctagaagt |
| VA1-5p-RR sense                      | ATCGCTCGAGCAGACCAGGAAGAGTGCCTGCTATAGCGAGCAGACC                                                                                                                                                                                                                                                                                                                                                                                                                                                                                |
| VA1-5p-RR antisense                  | GATCTCTAGAAGCGGGCACTTCCGTTGGTCTGCTCGCTATAGCGGG                                                                                                                                                                                                                                                                                                                                                                                                                                                                                |
| VA1-5p probe                         | CAGACCAGGAAGAGTGCCTGCT                                                                                                                                                                                                                                                                                                                                                                                                                                                                                                        |
| VA1-3p probe                         | AAAGGAGCACTCCCGGTTGTC                                                                                                                                                                                                                                                                                                                                                                                                                                                                                                         |
| RI257 5p probe                       | CAACGCACATTTTCAGTC                                                                                                                                                                                                                                                                                                                                                                                                                                                                                                            |
| RI257 3p probe                       | CTCAGGGCATGAAACAGGC                                                                                                                                                                                                                                                                                                                                                                                                                                                                                                           |
| VAI sense                            | ATCGGGTACCCCGTGCAAAAGGAGAGCCTGTA                                                                                                                                                                                                                                                                                                                                                                                                                                                                                              |
| VAI antisense                        | ATCGTCTAGACTTTCCAGCCTAACCCGCTTACG                                                                                                                                                                                                                                                                                                                                                                                                                                                                                             |
| D11_FLK sense                        | ATGCCTCGAGGCATCTTGCCTCAGAGAATG                                                                                                                                                                                                                                                                                                                                                                                                                                                                                                |
| D11_FLK antisense                    | GTCACTCTAGAAGAAGGCCAGGATTCACCTTAG                                                                                                                                                                                                                                                                                                                                                                                                                                                                                             |
| vtRNA1-2 probe                       | GTAACCGCTGAGCTAAAGCCA                                                                                                                                                                                                                                                                                                                                                                                                                                                                                                         |
| vtRNA1-3 probe                       | AGAGAGGTGGTTTGTGATGACAC                                                                                                                                                                                                                                                                                                                                                                                                                                                                                                       |
| 5sRNA probe                          | TCAGGGTGGTATGGCCGTAGAC                                                                                                                                                                                                                                                                                                                                                                                                                                                                                                        |
